# Supplementary material for: Adsorption and heterogeneous reactions of ClONO2 and N2O5 on/with NaCl aerosol
Source: Royal Society of Chemistry journal article supplement (doi:10.1039/c6ra03961h), 2016-01-01

## Supplementary Material for

# Adsorption and heterogeneous reactions of ClONO<sub>2</sub> and N<sub>2</sub>O<sub>5</sub> on/with NaCl aerosol

Yanhui Sun<sup>a,b</sup>, Qingzhu Zhang\*<sup>a</sup>, Wenxing Wang<sup>a</sup>

<sup>a</sup> Environment Research Institute, Shandong University, Jinan 250100,  
P. R. China

<sup>b</sup> College of Environment and Safety Engineering, Qingdao University of  
Science and Technology, Qingdao 266042, Shandong, P. R. China

**Keywords:** Heterogeneous reactions, ClONO<sub>2</sub> and N<sub>2</sub>O<sub>5</sub>, NaCl (100)  
surface, Density functional theory.

---

\*Corresponding author. E-mail: zqz@sdu.edu.cn

Fax: 86-531-88361990

Thirteen pages

Contains seven Figures

**Figure S1.** DMol<sup>3</sup> optimized geometries for H<sub>2</sub>O, ClONO<sub>2</sub> and N<sub>2</sub>O<sub>5</sub>. Distances are in angstrom, and angles are in degree. The values in parentheses are experimental data.

**Figure S2.** Possible configurations of adsorbed ClONO<sub>2</sub> on the NaCl (100) surface.

**Figure S3.** Possible configurations of adsorbed N<sub>2</sub>O<sub>5</sub> on the NaCl (100) surface.

**Figure S4.** Optimized geometries of the “free products” on the NaCl (100) surface.

**Figure S5.** Reaction schemes of ClONO<sub>2</sub> and N<sub>2</sub>O<sub>5</sub> with HCl or H<sub>2</sub>O on the NaCl (100) surface. The calculated data without zero-point energy (ZPE) correction are in black and with zero-point energy (ZPE) correction are in red.

**Figure S6.** Reaction schemes of H<sub>2</sub>O adsorption and reconstruction on the NaCl (100) surface. The calculated data without zero-point energy (ZPE) correction are in black and with zero-point energy (ZPE) correction are in red.

**Figure S7.** Reaction schemes of ClONO<sub>2</sub> and N<sub>2</sub>O<sub>5</sub> with the reconstructed NaCl (100) surface. The calculated data without zero-point energy (ZPE) correction are in black and with zero-point energy (ZPE) correction are in red.

**Figure S1.** DMol<sup>3</sup> optimized geometries for H<sub>2</sub>O, ClONO<sub>2</sub> and N<sub>2</sub>O<sub>5</sub>. Distances are in angstrom, and angles are in degree. The values in parentheses are experimental data.

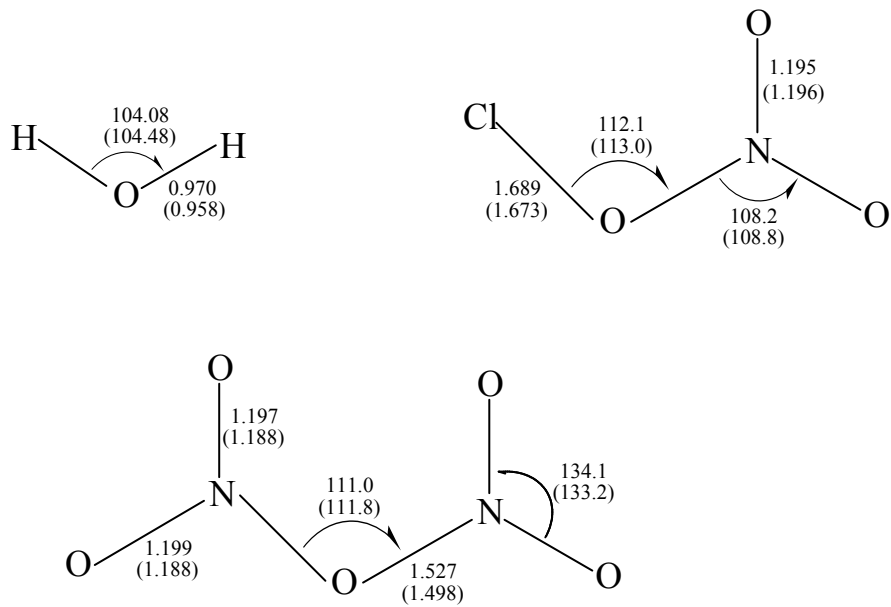

**Figure S2.** Possible configurations of adsorbed ClONO<sub>2</sub> on the NaCl (100) surface.

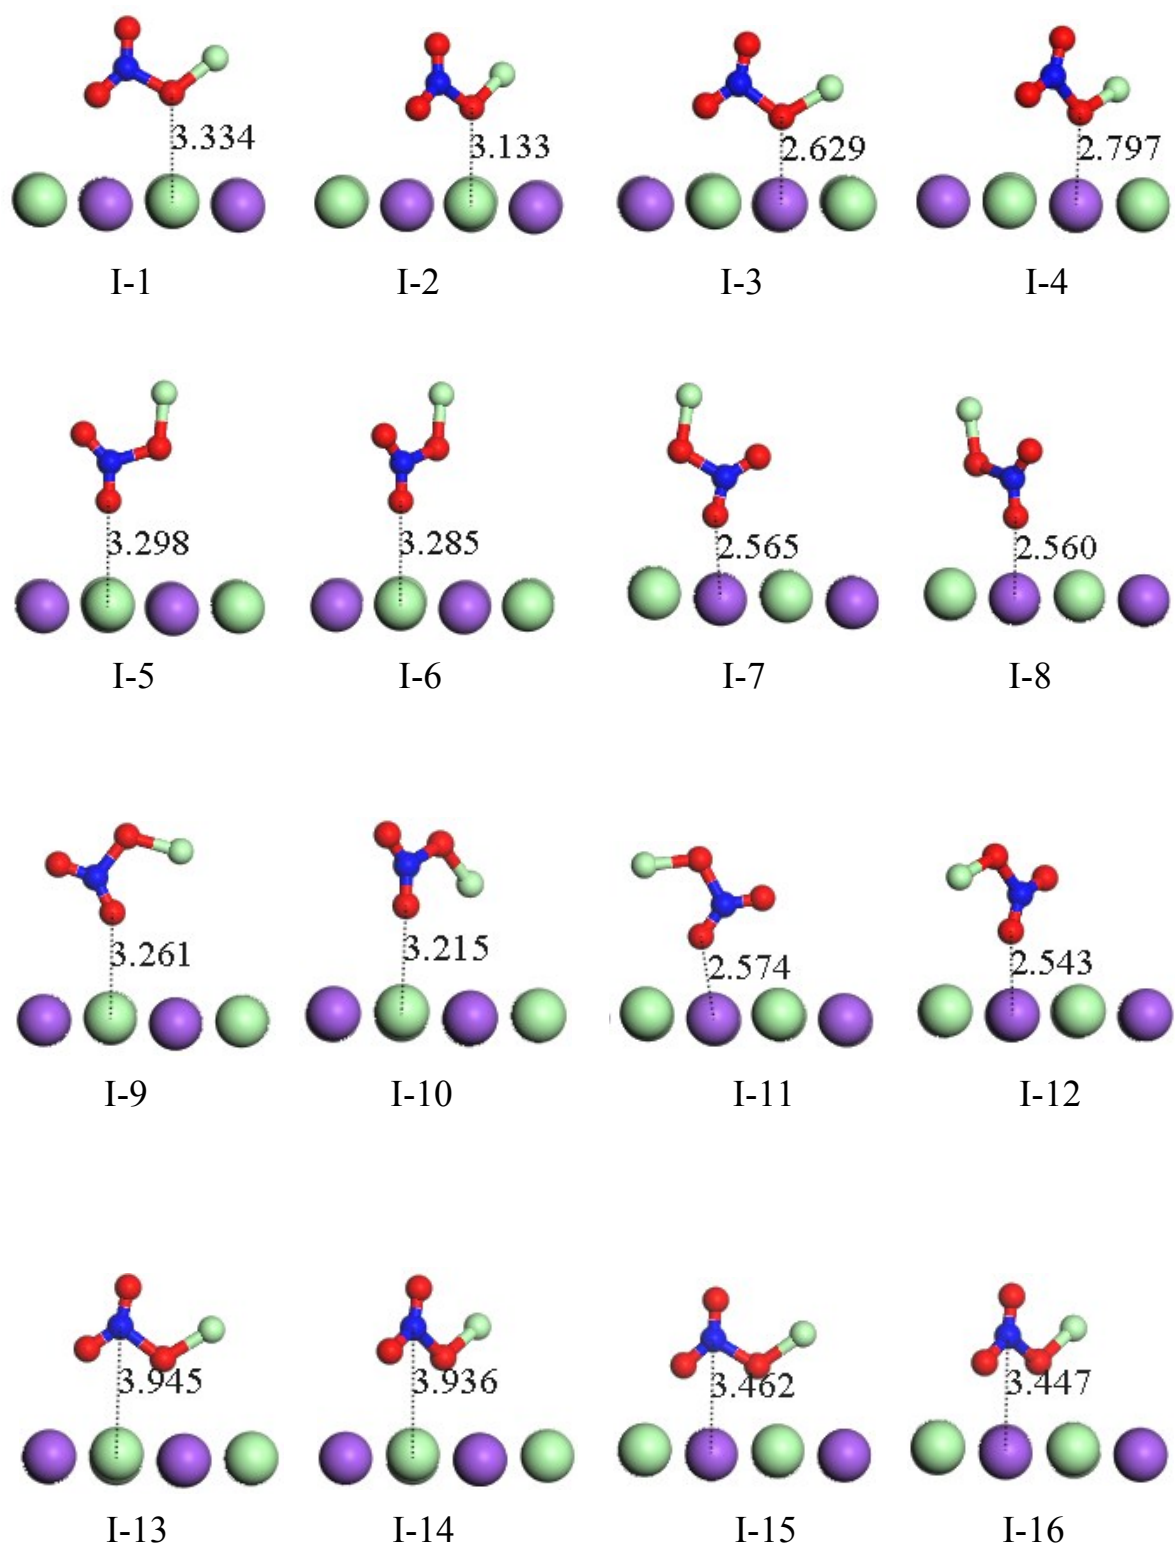

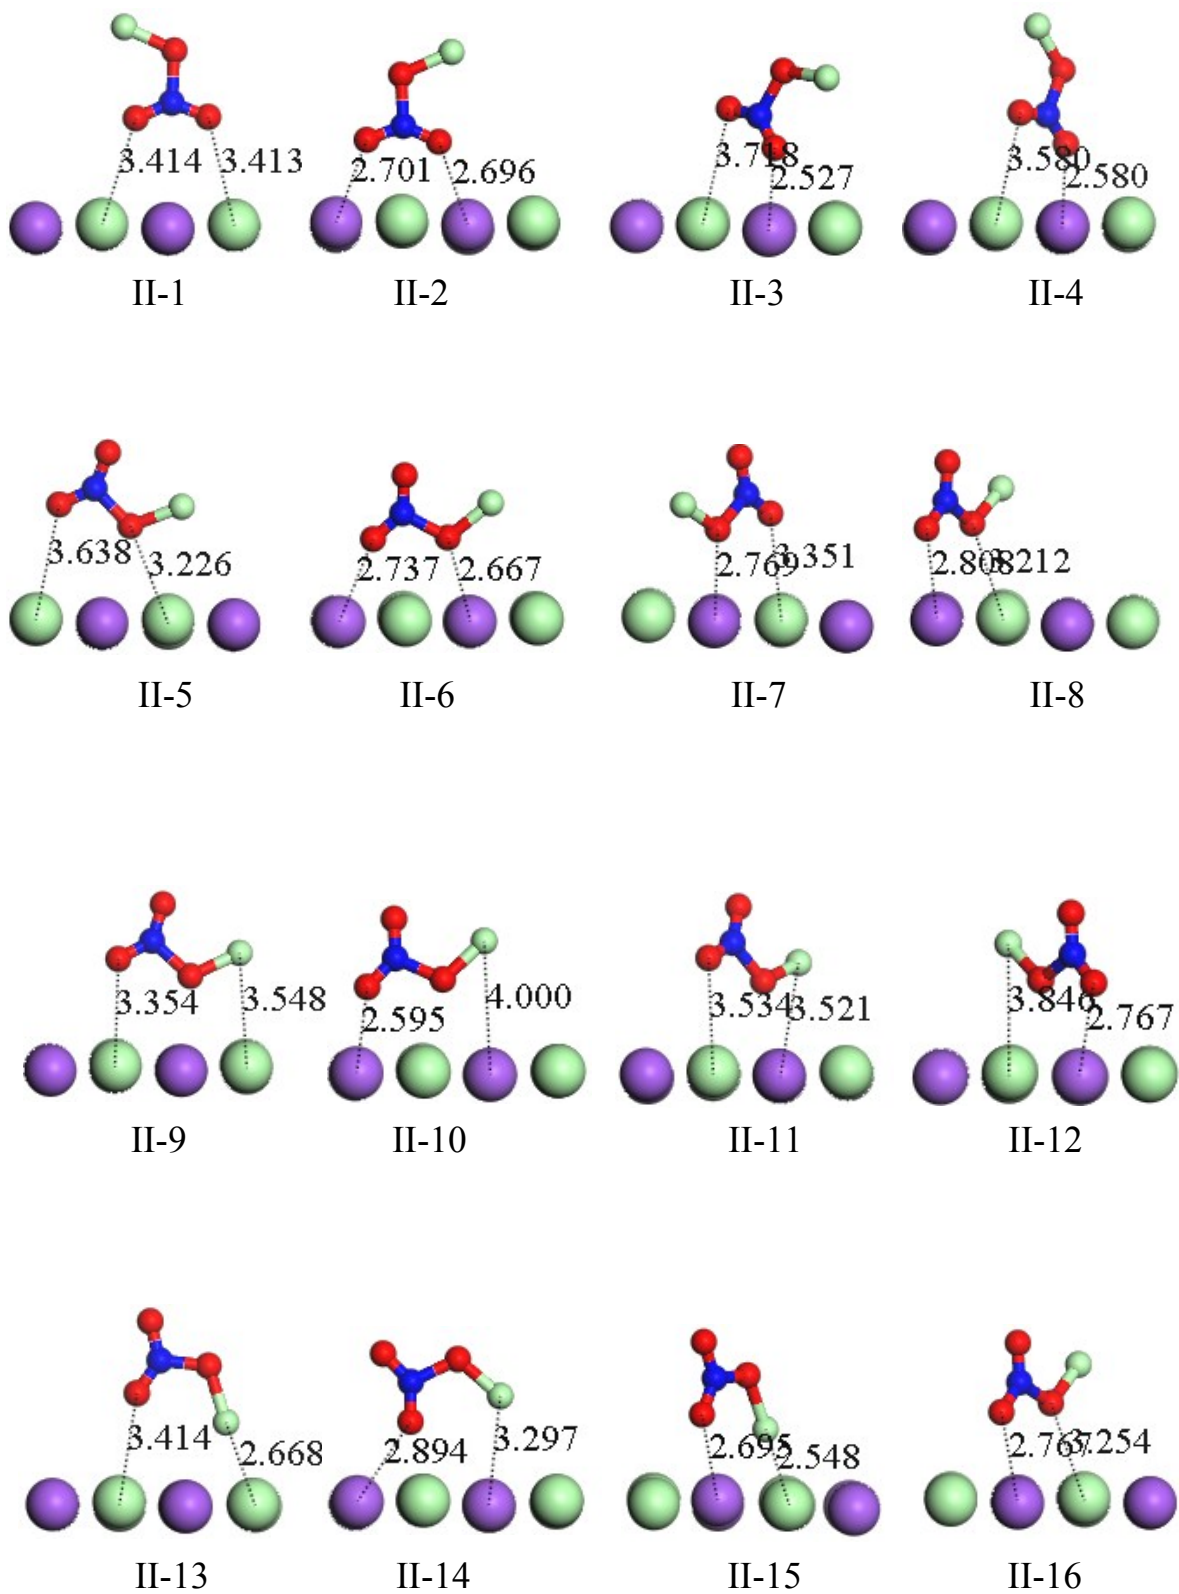

Figure S2 (Continued)

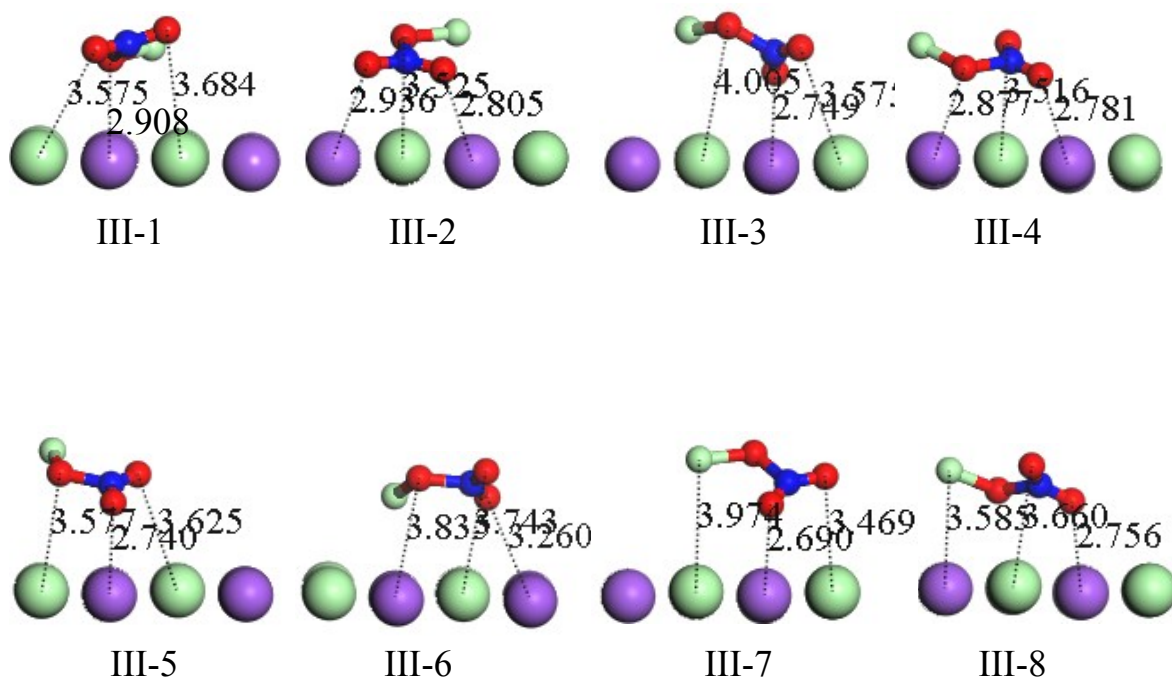

Figure S2 (Continued)

**Figure S3.** Possible configurations of adsorbed  $\text{N}_2\text{O}_5$  on the  $\text{NaCl}$  (100) surface.

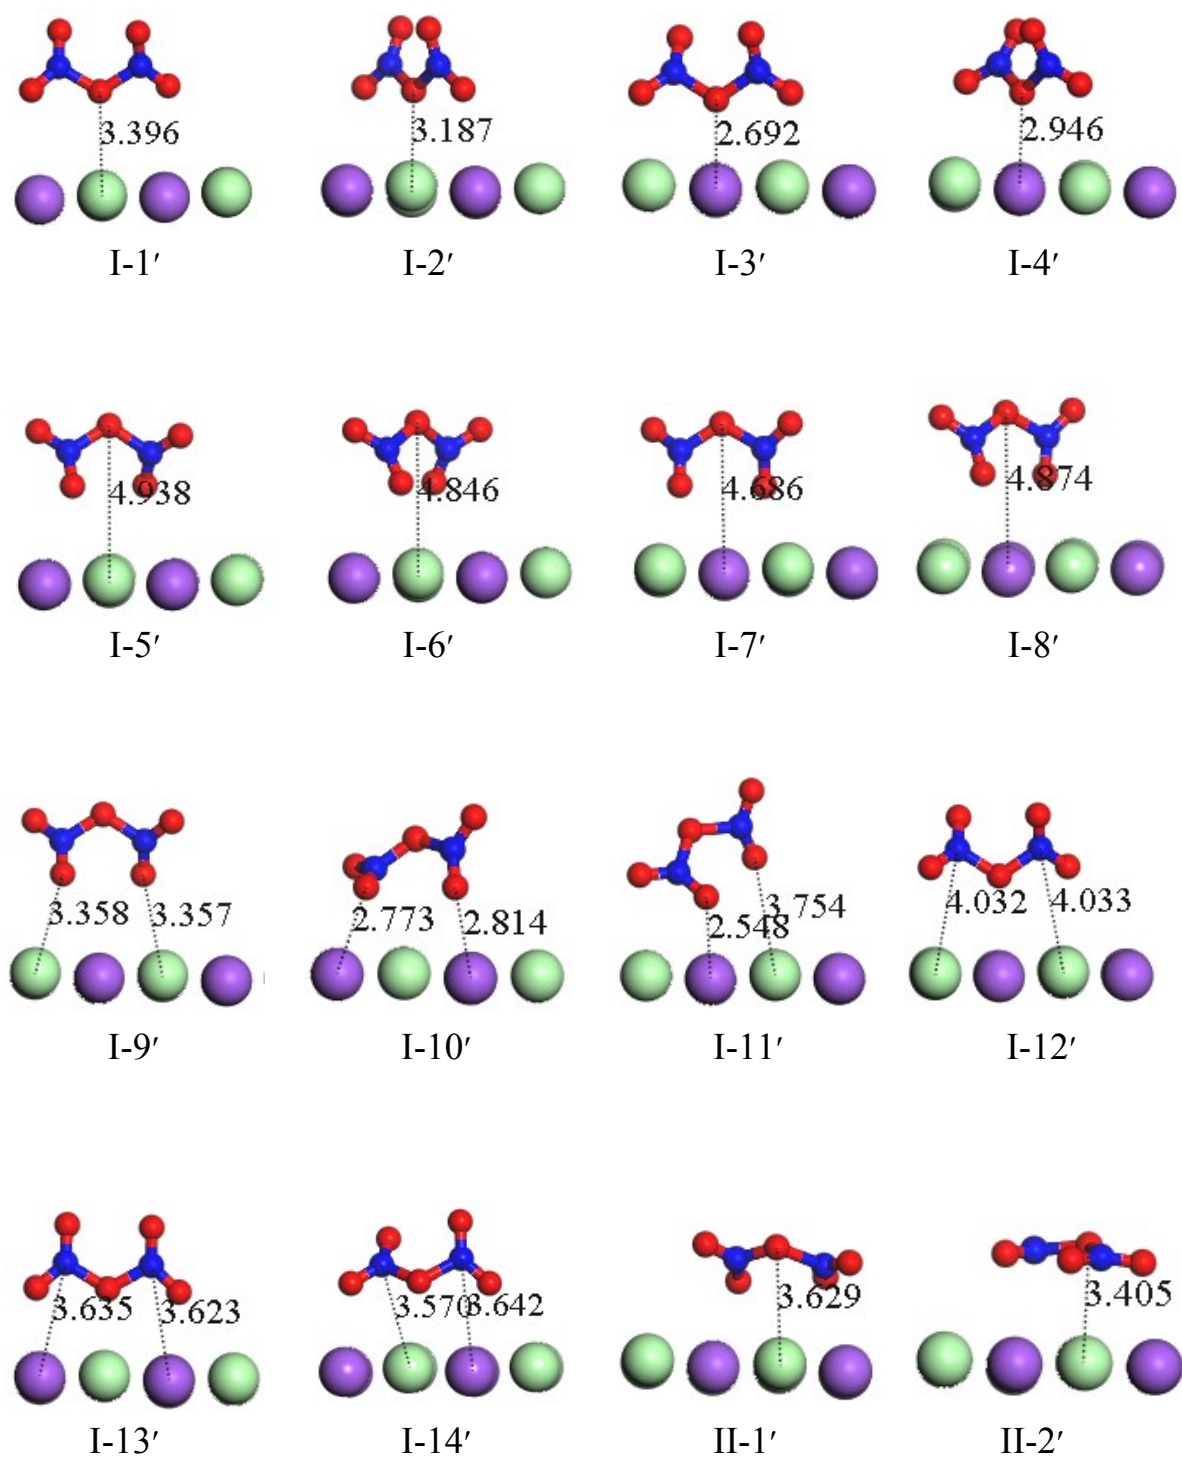

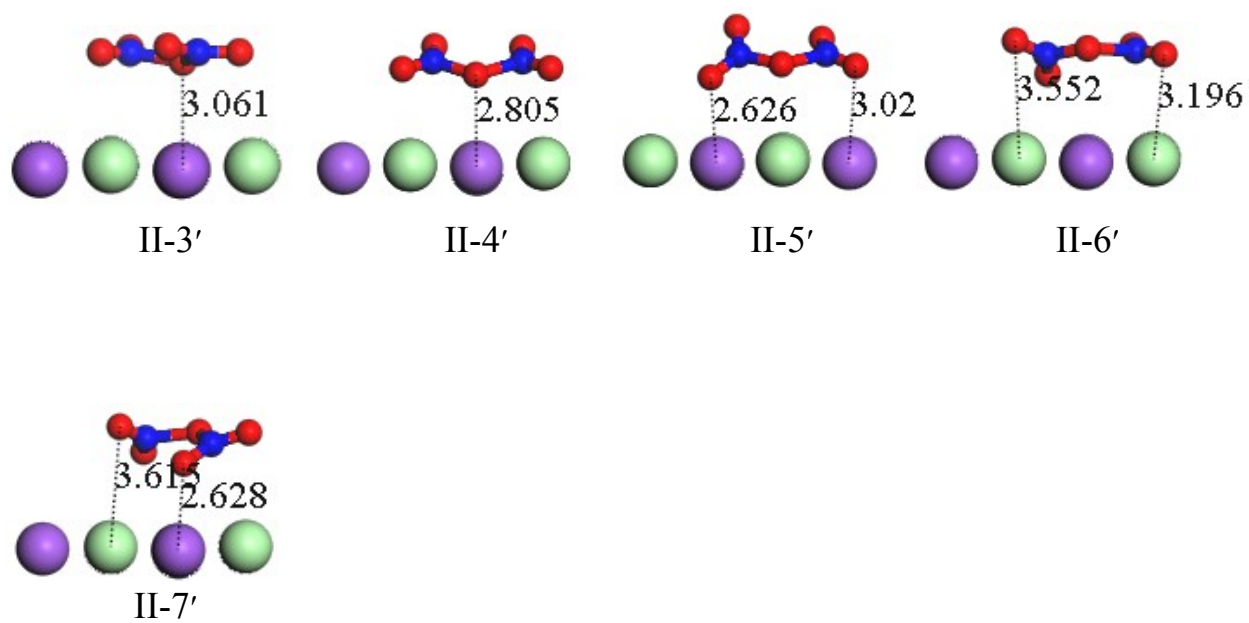

Figure S3 (*Continued*)



**Figure S4.** Optimized geometries of the “free products” on the NaCl (100) surface.

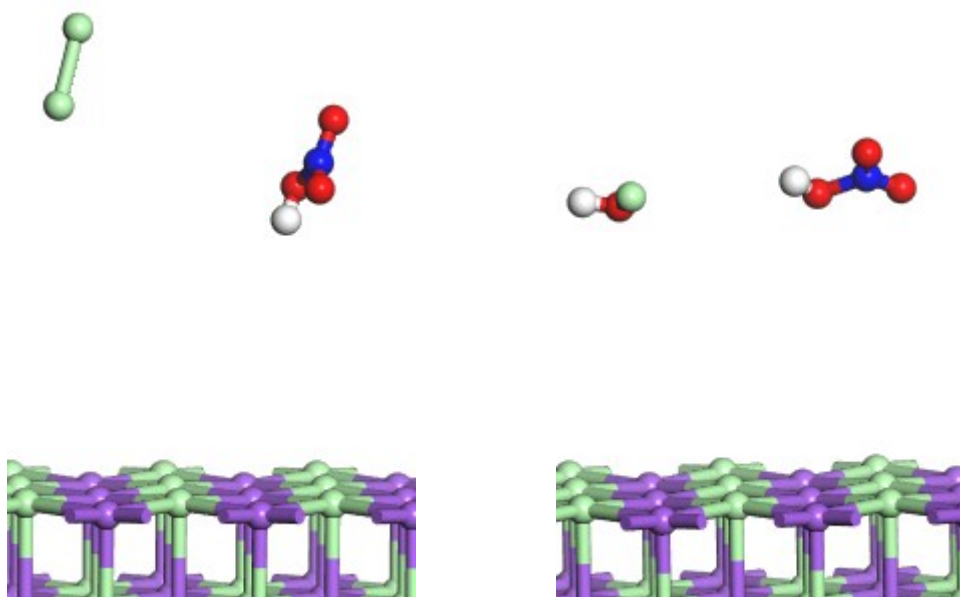

P1-p

P2-p

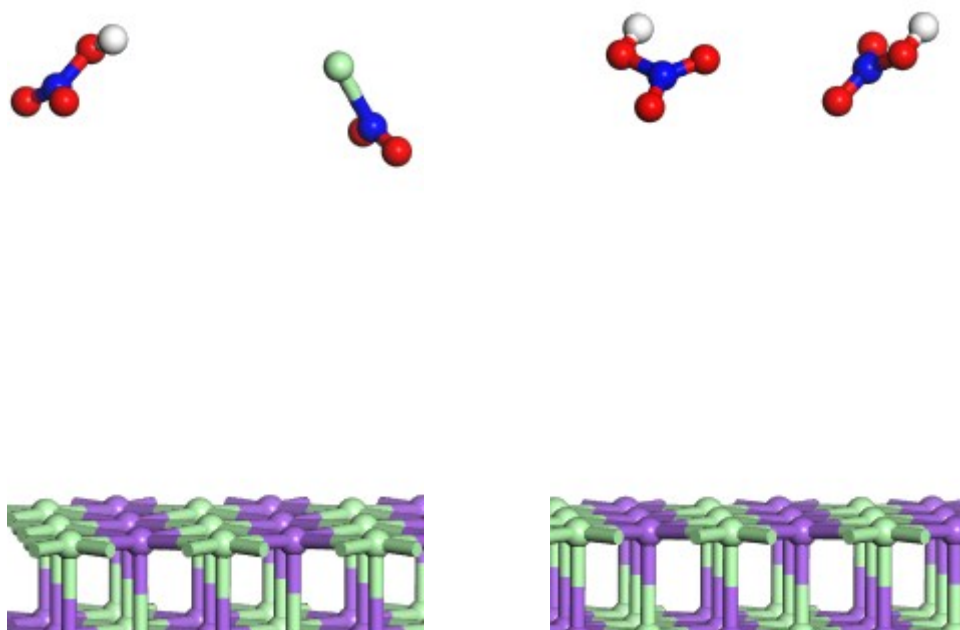

P3-p

P4-p

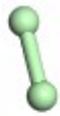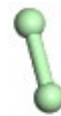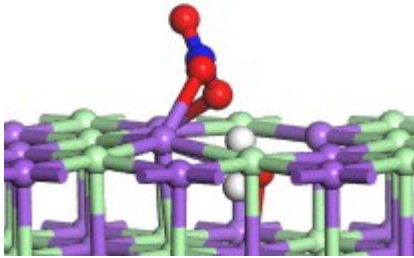

P5-p

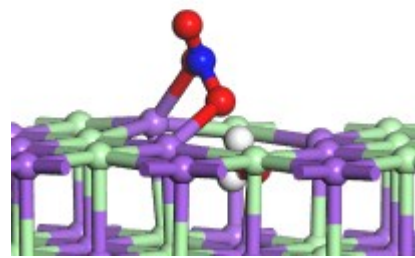

P6-p

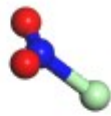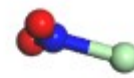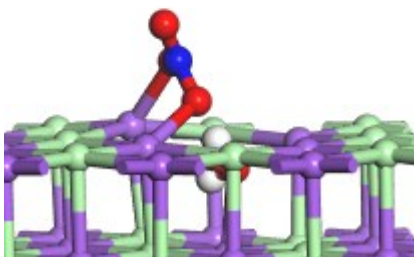

P7-p

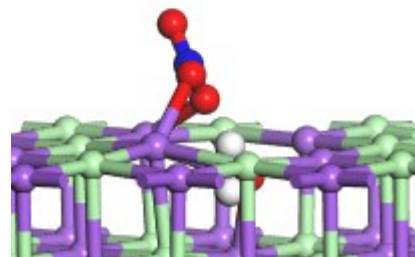

P8-p



**Figure S6.** Reaction schemes of H<sub>2</sub>O adsorption and reconstruction on the NaCl (100) surface. The calculated data without zero-point energy (ZPE) correction are in black and with zero-point energy (ZPE) correction are in red.

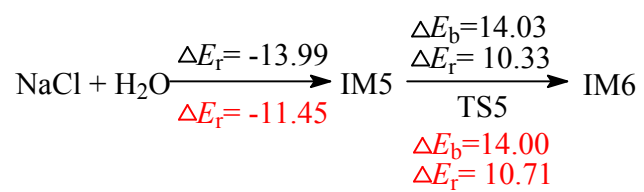

**Figure S7.** Reaction schemes of ClONO<sub>2</sub> and N<sub>2</sub>O<sub>5</sub> with the reconstructed NaCl (100) surface. The calculated data without zero-point energy (ZPE) correction are in black and with zero-point energy (ZPE) correction are in red.

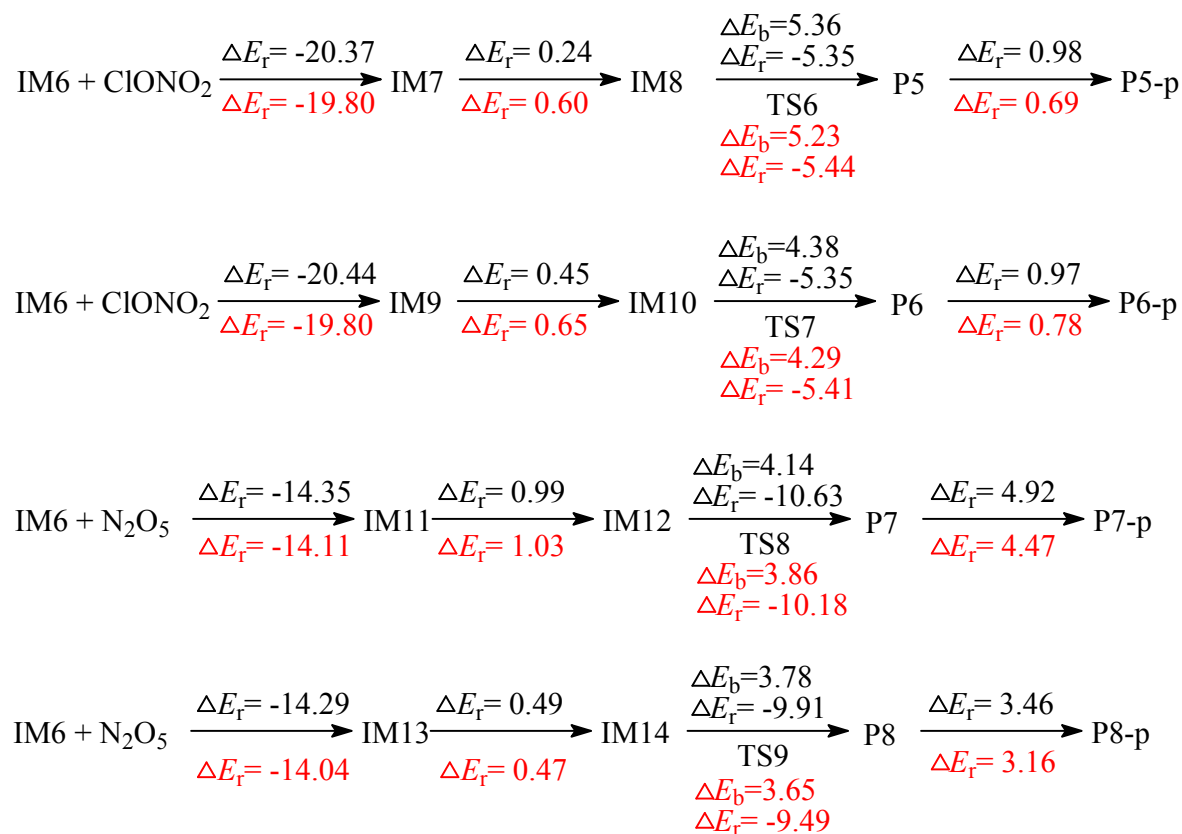

Supplement: c6ra03961h1.pdf [file c6ra03961h1.pdf]
